# Supplementary material for: Nitric Oxide Synthesis Metabolites—As Potential Markers in Chronic Kidney Disease in Children
Source: MDPI journal article supplement (doi:10.3390/cimb44080242), 2022-08-07
Supplement: s1 [file s1]

**Table S1.** Clinical and biochemical characteristics of patient groups.

| Studied parameter               | Control group             | II                       | III                      | IV                      | RRT                  |
|---------------------------------|---------------------------|--------------------------|--------------------------|-------------------------|----------------------|
| Age                             | 10<br>(7.25 - 13.75)      | 11<br>(10 - 14.25)       | 12<br>(10.5 - 15.25)     | 8.5<br>(3 - 14.25)      | 15<br>(8 - 17.75)    |
| GFR [ml/min/1.73mpc]            | 101.7<br>(92.49 - 109.72) | 74.25<br>(65.57 - 83.15) | 50.53<br>(45.04 - 57.13) | 26.48<br>(19.3 - 29.08) | 5<br>(5 - 5)         |
| creatinine (mg/dl)              | 0.58<br>(0.5 - 0.71)      | 0.81<br>(0.67 - 0.98)    | 1.16<br>(0.99 - 1.23)    | 1.99<br>(1.17 - 2.34)   | 1.63<br>(1.2 - 2.55) |
| inorganic phosphorus<br>(mg/dl) | 5.1<br>(4.6 - 6.1)        | 4.9<br>(4.6 - 5.5)       | 5<br>(4.47 - 5.62)       | 5.2<br>(4.75 - 5.75)    | 4.45<br>(3.95 - 4.8) |
| calcium (mg/dl)                 | 10<br>(9.88 - 10.4)       | 10 (9.8 - 10.2)          | 9.75 (9.6 - .88)         | 9.8 (9.05 - 9.9)        | 9.8(9.38-0.12)       |
| sodium (mg/dl)                  | 138 (137 - 140)           | 139 (137 - 139.75)       | 141(138-142.25)          | 141 (137 - 143.25)      | 138.5(137-140)       |
| potassium (mg/dl)               | 4.31 (4.2 - 4.6)          | 4.3 (4.1 - 4.62)         | 4.63 (4.34 - 4.68)       | 4.55 (4.35 - 4.75)      | 4.22(4.09- 4.36)     |
| urea (mg/dl)                    | 24 (22 - 28)              | 31 (29 - 39.75)          | 44 (31.5 - 52.75)        | 56 (14.55 - 79.5)       | 55(34.75- 6.75)      |
| Hb (g/dl)                       | 14.47 ± 1.72              | 13.03 ± 0.99             | 12.03 ± 1.26             | 10.37 ± 0.64            | 10.5 ± 1.03          |
| Ht (%)                          | 41.38 ± 4.88              | 36.06 ± 5.18             | 35.54 ± 3.14             | 31.69 ± 2.17            | 32.09 ± 3.46         |
| RBC [mln/mm <sup>3</sup> ]      | 4.87 ± 0.55               | 4.99 ± 0.45              | 4.12 ± 0.36              | 3.53 ± 0.26             | 3.49 ± 0.34          |
